# Supplementary material
Source: ML conference proceedings conference paper supplement (https://openreview.net/forum?id=0bv1QnEu2)
Supplement: supplementary_material [file attachment]

409 **A Appendix**

410 **A.1 Visualization of Coreset**

411 Figure 5 shows the visualization of coreset in the memory bank. The coreset of SoftCore is clean and decentralized.

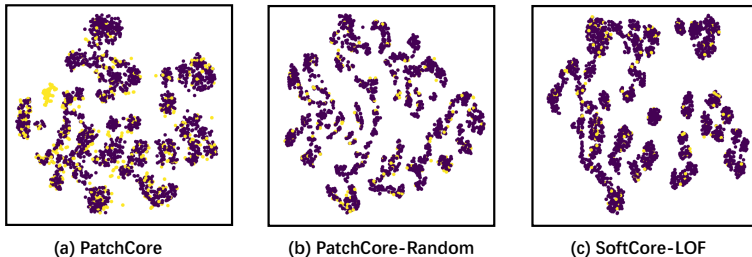

Figure 5: Comparison between coresets of AD methods with same noisy train set, MVTECAD-Pill with noise-0.1. We use t-SNE for dimension reduction for visualization. The yellow dots represent patch features from noisy sample, while the purple dots are nominal. Compared with the other two, SoftCore wipe off the noisy patch and model the nominal data properly.

412

413 **A.2 Details of Experimental Results**

Table 5: Anomaly localization performance details of all classes. The results are evaluated on MVTECAD-noise-0.1.

| Noise=0.1  | No overlap |       |           |                  |                   |              | Overlap |       |           |                     |              |
|------------|------------|-------|-----------|------------------|-------------------|--------------|---------|-------|-----------|---------------------|--------------|
| Category   | PaDiM      | CFLOW | PatchCore | SoftCore-nearest | SoftCore-gaussian | SoftCore-lof | PaDiM*  | CFLOW | PatchCore | PatchCore 1%-Random | SoftCore-lof |
| bottle     | 0.986      | 0.984 | 0.987     | 0.987            | 0.986             | 0.987        | 0.981   | 0.984 | 0.714     | 0.979               | 0.975        |
| cable      | 0.916      | 0.958 | 0.843     | 0.915            | 0.981             | 0.983        | 0.946   | 0.950 | 0.670     | 0.969               | 0.971        |
| capsule    | 0.986      | 0.985 | 0.986     | 0.988            | 0.977             | 0.990        | 0.984   | 0.986 | 0.883     | 0.984               | 0.989        |
| carpet     | 0.992      | 0.989 | 0.992     | 0.992            | 0.993             | 0.992        | 0.980   | 0.986 | 0.765     | 0.951               | 0.989        |
| grid       | 0.974      | 0.947 | 0.991     | 0.990            | 0.989             | 0.990        | 0.879   | 0.961 | 0.482     | 0.882               | 0.974        |
| hazelnut   | 0.987      | 0.991 | 0.990     | 0.990            | 0.991             | 0.990        | 0.978   | 0.982 | 0.418     | 0.957               | 0.924        |
| leather    | 0.994      | 0.994 | 0.991     | 0.994            | 0.994             | 0.993        | 0.992   | 0.993 | 0.683     | 0.987               | 0.993        |
| metal_nut  | 0.933      | 0.956 | 0.842     | 0.894            | 0.964             | 0.984        | 0.911   | 0.960 | 0.779     | 0.938               | 0.983        |
| pill       | 0.956      | 0.983 | 0.971     | 0.974            | 0.972             | 0.981        | 0.960   | 0.976 | 0.608     | 0.971               | 0.976        |
| screw      | 0.989      | 0.977 | 0.995     | 0.991            | 0.969             | 0.994        | 0.974   | 0.973 | 0.745     | 0.953               | 0.969        |
| tile       | 0.956      | 0.953 | 0.953     | 0.960            | 0.962             | 0.954        | 0.921   | 0.945 | 0.700     | 0.919               | 0.954        |
| toothbrush | 0.991      | 0.988 | 0.989     | 0.988            | 0.988             | 0.985        | 0.954   | 0.984 | 0.692     | 0.984               | 0.985        |
| transistor | 0.960      | 0.887 | 0.847     | 0.965            | 0.954             | 0.942        | 0.939   | 0.834 | 0.317     | 0.914               | 0.936        |
| wood       | 0.973      | 0.964 | 0.969     | 0.947            | 0.946             | 0.939        | 0.946   | 0.934 | 0.522     | 0.896               | 0.929        |
| zipper     | 0.986      | 0.978 | 0.986     | 0.989            | 0.988             | 0.988        | 0.978   | 0.979 | 0.823     | 0.975               | 0.986        |

414 **A.3 Performance Trends in Noise**

415 Figure 6 and Figure 7 show the performance trends of SOTA AD methods and softcore in different  
 416 noisy scenes. Since overconfident in the training data and the greedy subsampling algorithm,  
 417 PatchCore performance decreases most obviously with the noise increase. In contrast, CFLOW and  
 418 PaDiM are also affected by noise, but the amplitudes are smaller. SoftCore maintains a consistent  
 419 level of performance at all noise levels. Unfortunately, SoftCore is slightly weaker than PatchCore in  
 420 noiseless scenes, which may be due to the excessively conservative threshold setting.

421 **A.4 Image-level Denoising V.S. Patch-level Denoising**

422 A simple strategy to eliminate the noisy data is to delete the anomaly samples before training. This is  
 423 an unsupervised outlier detection task. However, the existing outlier detection methods do not work  
 424 well because the distance between abnormal and normal images is much smaller than the distance

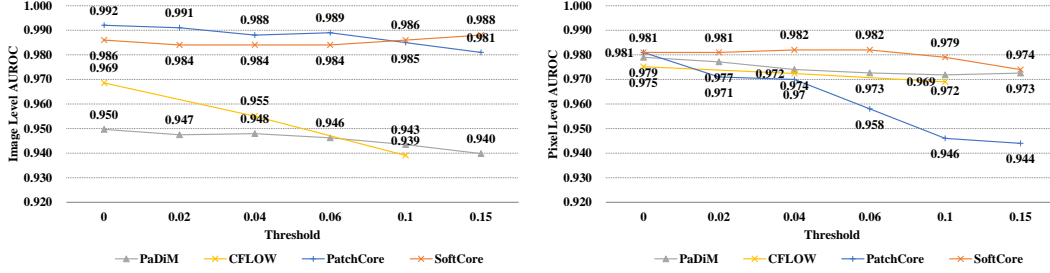

Figure 6: Performance in different level no overlap noise.

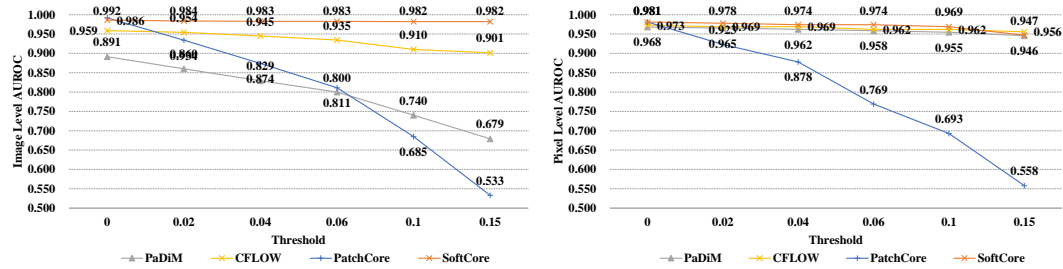

Figure 7: Performance in different level overlap noise.

425 between different classes. Meanwhile, we found that some AD methods could also detect outliers in  
 426 the training set. After weighing the costs and effects, we apply PaDiM\* as the image-level denoising  
 427 method to compare with patch-level denoising Softcore. PaDiM\* is a simplified version of PaDiM,  
 428 which uses ResNet18 as the backbone with faster computing speed. PaDiM\* scores all training  
 429 samples and then removes the pieces with high outliers based on the threshold. The comparison in  
 430 Table 6 and Table 7 show that image-level denoising dramatically improves the performance of  
 431 existing SOTA AD methods in the noisy scene. But there is still a gap when compared with SoftCore.

Table 6: The anomaly detection performance of image-level denoising and patch-level denoising. The PaDiM\*+PaDiM\*, PaDiM\*+CFLOW, and PaDiM\*+PatchCore are AD methods with image-level denoising. PaDiM\* is used in image level denoising, where we use the same threshold (0.15) as it in softcore. And we also tried the tricky threshold-0.1 as the noise ratio, but it works worse. The results are evaluated on MVTECAD-noise-0.1 with overlap.

| Category   | PaDiM* | PaDiM*+<br>PaDiM* | CFLOW        | PaDiM*+<br>CFLOW | PatchCore | PaDiM*(threshold<br>-0.1)+PatchCore | PaDiM*+<br>PatchCore | SoftCore-lof |
|------------|--------|-------------------|--------------|------------------|-----------|-------------------------------------|----------------------|--------------|
| bottle     | 0.937  | 0.994             | <b>1.000</b> | <b>1.000</b>     | 0.692     | 0.984                               | <b>1.000</b>         | <b>1.000</b> |
| cable      | 0.680  | 0.741             | 0.916        | 0.841            | 0.756     | 0.890                               | 0.888                | <b>0.994</b> |
| capsule    | 0.796  | 0.854             | 0.945        | 0.939            | 0.783     | 0.892                               | 0.909                | <b>0.955</b> |
| carpet     | 0.890  | 0.937             | 0.960        | 0.950            | 0.681     | 0.963                               | 0.974                | <b>0.993</b> |
| grid       | 0.674  | 0.765             | 0.799        | 0.830            | 0.526     | 0.850                               | 0.870                | <b>0.969</b> |
| hazelnut   | 0.543  | 0.725             | 0.999        | 0.990            | 0.441     | 0.871                               | 0.929                | <b>1.000</b> |
| leather    | 0.964  | 0.979             | 0.996        | <b>1.000</b>     | 0.739     | 0.957                               | 0.989                | <b>1.000</b> |
| metal_nut  | 0.820  | 0.949             | 0.957        | 0.986            | 0.765     | 0.965                               | 0.977                | <b>1.000</b> |
| pill       | 0.722  | 0.745             | 0.897        | 0.924            | 0.770     | 0.898                               | 0.913                | <b>0.955</b> |
| screw      | 0.567  | 0.542             | 0.570        | 0.639            | 0.710     | 0.916                               | 0.907                | <b>0.923</b> |
| tile       | 0.830  | 0.906             | 0.980        | 0.981            | 0.716     | 0.939                               | 0.957                | <b>0.981</b> |
| toothbrush | 0.700  | 0.869             | 0.878        | 0.928            | 0.800     | 0.981                               | <b>0.997</b>         | 0.994        |
| transistor | 0.471  | 0.770             | 0.872        | 0.788            | 0.491     | 0.777                               | 0.825                | <b>0.999</b> |
| wood       | 0.831  | 0.966             | 0.954        | 0.970            | 0.579     | 0.943                               | 0.976                | <b>0.986</b> |
| zipper     | 0.679  | 0.678             | 0.931        | 0.873            | 0.792     | 0.909                               | 0.914                | <b>0.974</b> |
| Average    | 0.740  | 0.828             | 0.910        | 0.909            | 0.683     | 0.916                               | 0.935                | <b>0.982</b> |

Table 7: The anomaly localization performance of image-level denoising and patch-level denoising.

| Category   | PaDiM* | PaDiM*+<br>PaDiM* | CFLOW        | PaDiM*+<br>CFLOW | PatchCore | PaDiM*(threshold<br>-0.1)+PatchCore | PaDiM*+<br>PatchCore | SoftCore-lof |
|------------|--------|-------------------|--------------|------------------|-----------|-------------------------------------|----------------------|--------------|
| bottle     | 0.937  | 0.983             | <b>1.000</b> | 0.986            | 0.692     | 0.984                               | 0.985                | <b>1.000</b> |
| cable      | 0.680  | 0.954             | 0.916        | 0.956            | 0.756     | 0.738                               | 0.739                | <b>0.994</b> |
| capsule    | 0.796  | 0.982             | 0.945        | <b>0.985</b>     | 0.783     | 0.851                               | 0.876                | 0.955        |
| carpet     | 0.890  | 0.984             | 0.960        | 0.988            | 0.681     | 0.960                               | 0.988                | <b>0.993</b> |
| grid       | 0.674  | 0.876             | 0.799        | 0.948            | 0.526     | 0.797                               | 0.818                | <b>0.969</b> |
| hazelnut   | 0.543  | 0.977             | 0.999        | 0.987            | 0.441     | 0.798                               | 0.825                | <b>1.000</b> |
| leather    | 0.964  | 0.993             | 0.996        | 0.995            | 0.739     | 0.966                               | 0.979                | <b>1.000</b> |
| metal_nut  | 0.820  | 0.968             | 0.957        | 0.984            | 0.765     | 0.784                               | 0.834                | <b>1.000</b> |
| pill       | 0.722  | 0.956             | 0.897        | <b>0.984</b>     | 0.770     | 0.706                               | 0.713                | 0.955        |
| screw      | 0.567  | 0.968             | 0.570        | <b>0.970</b>     | 0.710     | 0.887                               | 0.889                | 0.923        |
| tile       | 0.830  | 0.927             | 0.980        | 0.946            | 0.716     | 0.924                               | 0.968                | <b>0.981</b> |
| toothbrush | 0.700  | 0.986             | 0.878        | 0.983            | 0.800     | 0.977                               | 0.986                | <b>0.994</b> |
| transistor | 0.471  | 0.965             | 0.872        | 0.908            | 0.491     | 0.932                               | 0.945                | <b>0.999</b> |
| wood       | 0.831  | 0.947             | 0.954        | 0.943            | 0.579     | 0.800                               | 0.918                | <b>0.986</b> |
| zipper     | 0.679  | 0.973             | 0.931        | 0.967            | 0.792     | 0.875                               | 0.878                | <b>0.974</b> |
| Average    | 0.740  | 0.963             | 0.910        | 0.969            | 0.683     | 0.865                               | 0.889                | <b>0.982</b> |

Table 8: Mean training and inference time per category on MVTecAD. The unit of time is second.

|                  | Training time | Inference time |
|------------------|---------------|----------------|
| SoftCore-LOF     | 21.2958       | 15.6146        |
| PatchCore        | 21.3869       | 15.8763        |
| PaDiM*+PatchCore | 74.2912       | 15.5386        |

#### 432 A.5 Training and Inference Time

433 Excluding the loading time of data, the comparison of the remaining time overhead between SoftCore  
 434 and PatchCore is shown in Figure 8. The GPU used in this experiment is RTX TITAN 24G. Both spend  
 435 almost the same amount of time training and testing, which means that our patch-level denoising does  
 436 not bring unacceptable overhead. On the contrary, the image-level denoising dramatically increases  
 437 training time.

#### 438 A.6 The Noise in Existing Dataset

439 For example, MVTec Anomaly Detection benchmark (MVTecAD) dataset [5] is a comprehensive  
 440 and widely used benchmark for unsupervised abnormal detection. While in such a well-established  
 441 academic dataset, noisy data also exists in the training set, as in Fig. 8.

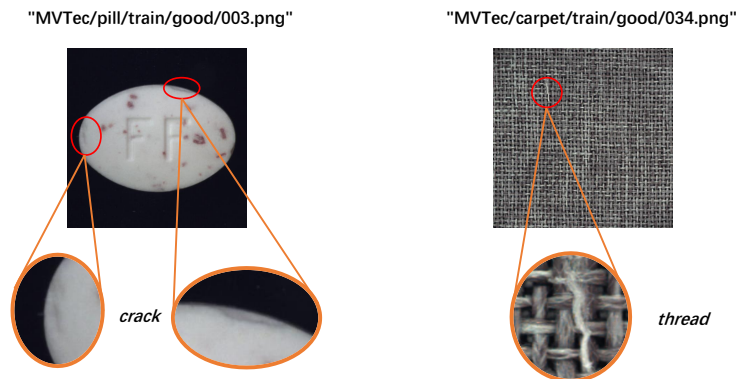

Figure 8: Noisy example in the MVTecAD dataset which is a widely used benchmark for AD research.
